# Supplementary material
Source: PubMed Central journal article supplement (PMC7796944)
Supplement: NIHMS1621592-supplement-1.pdf [file NIHMS1621592-supplement-1.pdf]

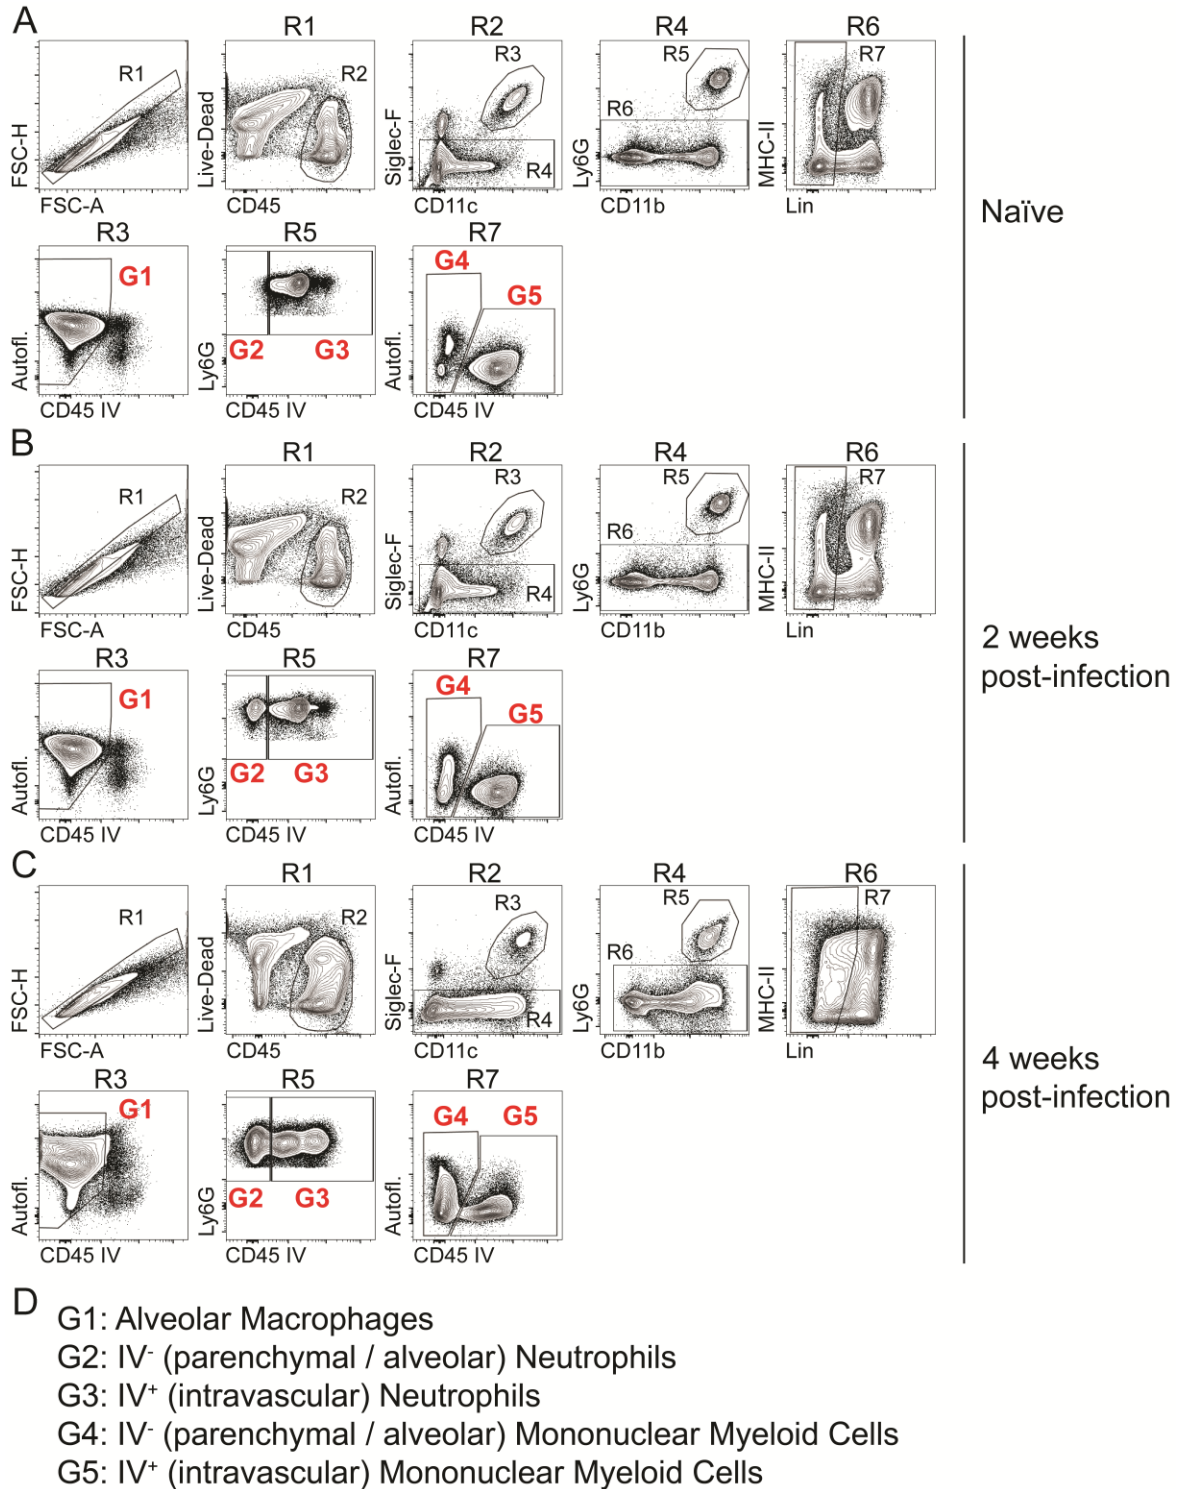

**Figure S1: Gating strategy used for analysis of murine pulmonary myeloid cells.** Cells were phenotyped according to their expression of CD45, viability dye, CD11c, Siglec-F, CD11b, Ly6G, I-A/I-E (MHC-II), Lin (lymphocytic lineage markers – TCR $\beta$ , TCR $\gamma\delta$ , CD19 and NK1.1)

and intravascular CD45.1/2 staining. Representative dot plots of cells isolated from lungs of naïve (A), or Mtb-infected mice at 2 (B) and 4 (C) weeks post-infection (wpi); (D) nomenclature used throughout the text to identify specific cell populations as defined in Fig. S1A, S1B and S1C.

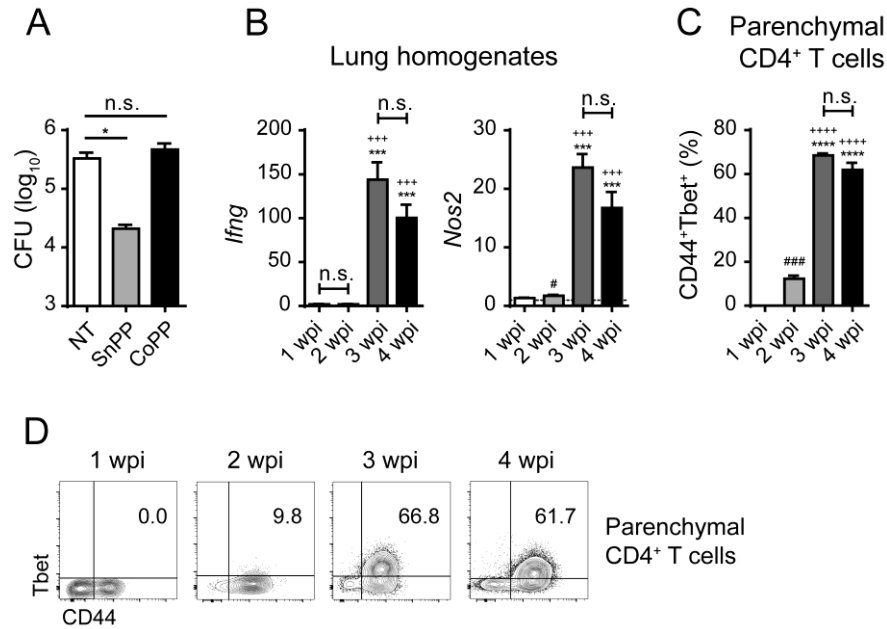

**Figure S2: Outcomes of in vivo treatment of Mtb-infected mice with HO-1 inhibitor or inducer and time course of pulmonary IFN $\gamma$  and NOS2 expression as well as**

**CD44<sup>+</sup>Tbet<sup>+</sup>CD4<sup>+</sup> T cell recruitment in Mtb-infected mice.**

(A) CFU loads in lung homogenates of Mtb-infected C57BL/6 mice intraperitoneally treated or not with tin protoporphyrin (SnPP - 5 mg/kg/day – HO-1 inhibitor) or cobalt protoporphyrin (CoPP - 5 mg/kg/day – HO-1 inducer), daily for 21 days starting at 28 days post-infection (n = 4 mice/group) (B) Quantification of mRNA for IFN $\gamma$  (left) and NOS2 (right) by real time PCR in lung homogenates obtained from Mtb-infected C57BL/6 mice at 1, 2, 3 and 4 weeks post-infection (wpi) (n = 4 mice/group) - Actb F: 5' AGC TGC GTT TTA CAC CCT TT 3'; Actb R: 5' AAG CCA TGC CAA TGT TGT CT 3'; Ifng F: 5' CGA TCT TGG CTT TGC AGC T 3'; Ifng R: 5' CCT TTT TCG CCT TGC TGT TG 3'; Nos2 F: 5' CGA AAC GCT TCA CTT CCA A 3'; Nos2 R: 5' TGA GCC TAT ATT GCT GTG GCT 3'; (C) Frequencies of CD44<sup>+</sup>Tbet<sup>+</sup> cells among CD4<sup>+</sup> T lymphocytes measured by flow cytometry in cells obtained from lungs of Mtb-infected C57BL/6 mice at 1, 2, 3 and 4 wpi (n = 4 mice/group); (D) Representative dot plots

from data shown in Fig. 2B (flow cytometry data concatenated from 4 samples). The data are presented as the means  $\pm$  standard error (A, B and C), and dot plots from concatenated data (D). Data are representative of 2 (A, C and D) or 3 (B) independent experiments. Statistical analysis: unpaired Student's t test. (A) \* =  $p < 0.05$ , n.s = non-significant. (B and C) # =  $p < 0.05$  and #### =  $p < 0.001$  compared to 1 wpi, \*\*\* =  $p < 0.001$  and \*\*\*\* =  $p < 0.0001$  as compared to 1 wpi; +++ =  $p < 0.001$  and ++++ =  $p < 0.0001$  as compared to 2 wpi, n.s = non-significant.

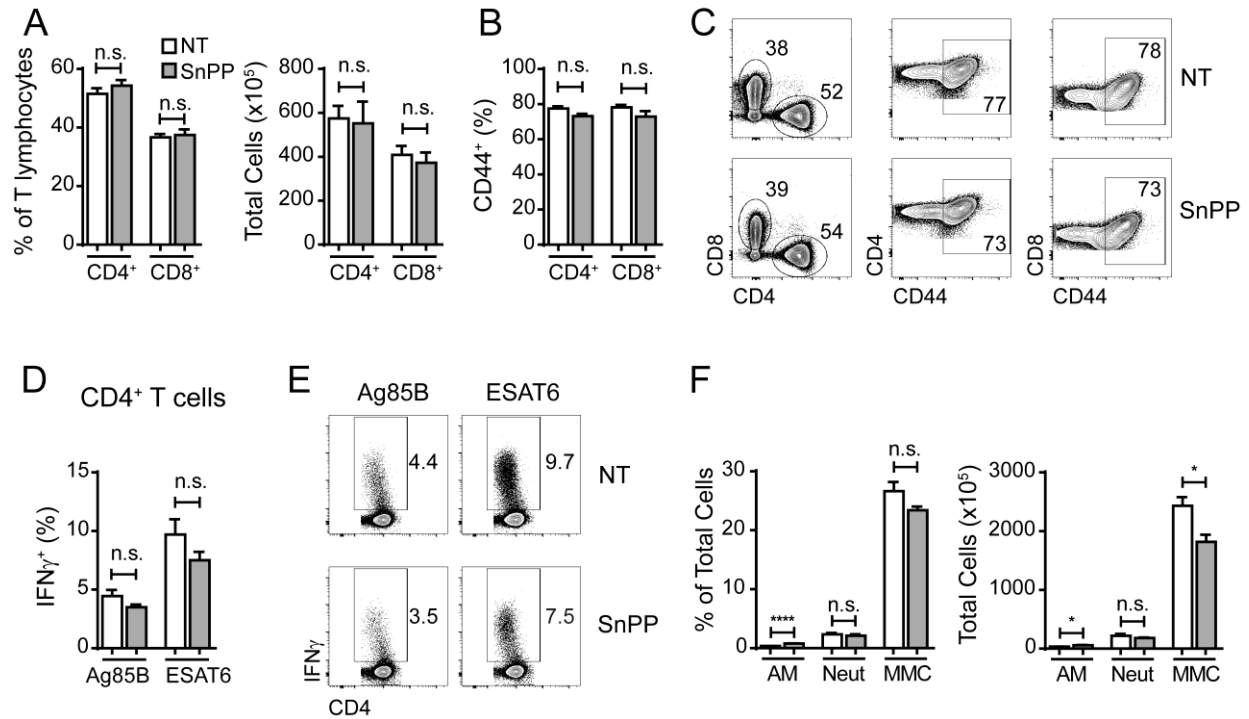

**Figure S3: HO-1 inhibition has no significant effect on IFN $\gamma$  production by CD4<sup>+</sup> T cells.**

(A) Frequencies of CD4<sup>+</sup> and CD8<sup>+</sup> cells among T lymphocytes (left) and total number of CD4<sup>+</sup> and CD8<sup>+</sup> T lymphocytes (right) and (B) frequencies of CD44<sup>+</sup> cells among CD4<sup>+</sup> and CD8<sup>+</sup> T lymphocytes obtained from lungs of Mtb-infected C57BL/6 treated or not for 21 days with SnPP, as measured by flow cytometry (n = 4 mice/group); (C) Representative dot plots of data shown in Fig. S2A and B (flow cytometry data concatenated from 4 samples); (D) Frequencies of IFN $\gamma$ <sup>+</sup> cells in CD4<sup>+</sup> T lymphocytes obtained from lungs of Mtb-infected C57BL/6 mice treated or not for 21 days with SnPP (cells were stimulated for 5 hours with synthetic peptides representing the immunodominant Mtb epitopes Ag85B (Ag85B<sub>280-294</sub>) or ESAT-6 (ESAT-6<sub>4-17</sub>) in the presence of a brefeldin and monensin prior to staining) (n = 4 mice/group); (E) Representative dot plots from data shown in Fig. S2D (flow cytometry data concatenated from 4 samples). (F) Frequency of total (left) and total number (right) of alveolar macrophages (AM) and IV- parenchymal / alveolar neutrophils (Neut) and mononuclear myeloid cells (MMC) in

lungs of Mtb-infected C57BL/6 mice treated or not for 21 days with SnPP, gated as detailed in Fig. S1 (n = 4 mice/group). Data expressed as mean  $\pm$  standard error (A, B, D and F) and dot plots from concatenated data (C and E). Data are representative of 2 independent experiments. Statistical analysis: Student's t test. \* =  $p < 0.05$ , \*\*\*\* =  $p < 0.0001$ , n.s. = non-significant.

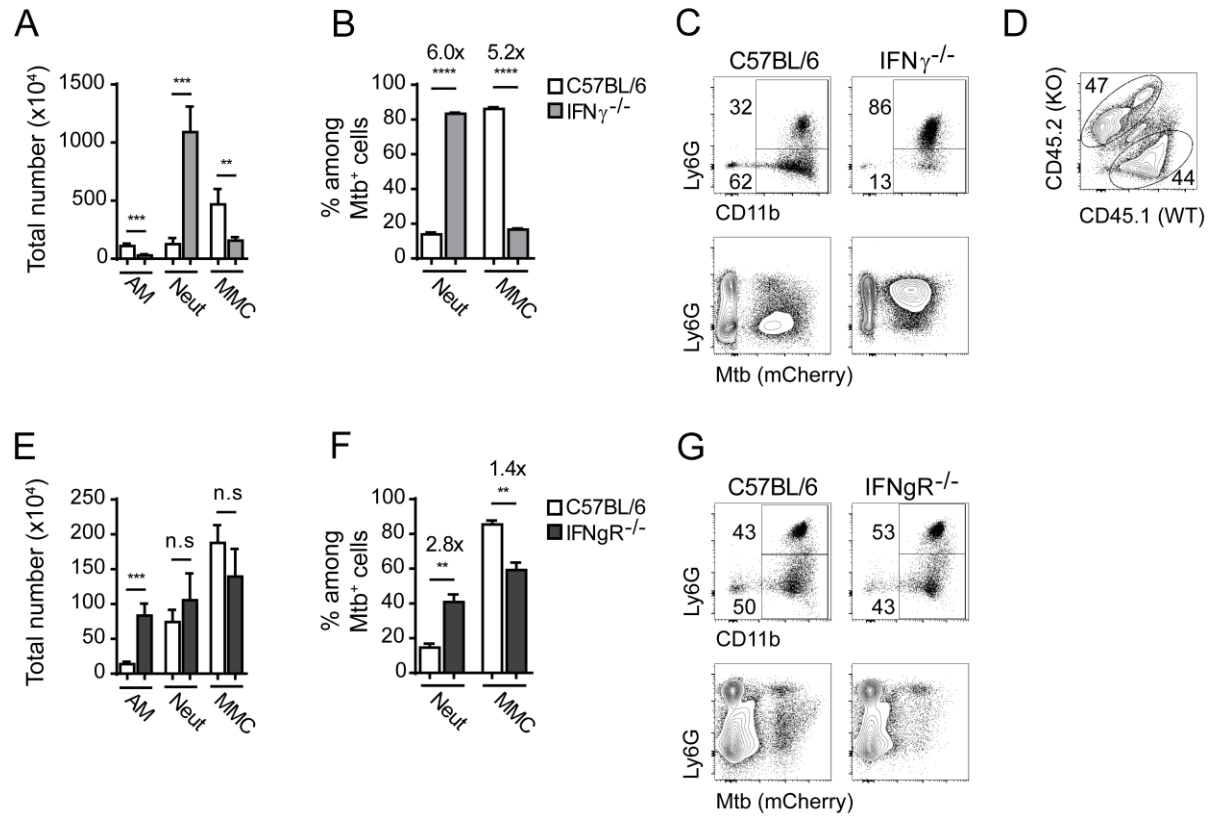

**Figure S4: Validation of mixed bone marrow chimera approach for assessing the role of IFN $\gamma$  signaling on HO-1 expression in vivo.** (A) Total number of alveolar macrophages (AM), parenchymal / alveolar neutrophils (Neut) and parenchymal / alveolar mononuclear myeloid cells (MMC), detected by flow cytometry and gated as detailed in Fig. S1, in lungs from C57BL/6 or IFN $\gamma$ <sup>-/-</sup> Mtb-infected mice at 4 weeks post-infection (wpi) (n = 4 mice/group); (B) Frequencies represented by parenchymal / alveolar neutrophils (Neut) and parenchymal / alveolar mononuclear myeloid cells (MMC) among mCherry Mtb<sup>+</sup> cells in lungs of Mtb-infected C57BL/6 or IFN $\gamma$ <sup>-/-</sup> mice at 4 wpi (n = 4 mice/group); (C) Representative dot plots showing frequencies of neutrophils and CD11b<sup>+</sup> mononuclear myeloid cells (top) and mCherry Mtb staining in Ly6G<sup>+</sup> and Ly6G<sup>-</sup> cells (bottom), selected from the CD45 IV<sup>-</sup> subset in gate R4 as detailed in Fig. S1, in lungs from C57BL/6 or IFN $\gamma$ <sup>-/-</sup> Mtb-infected mice at 4 wpi (flow cytometry data concatenated from 4 samples); (D) Representative dot plots showing the

frequencies of WT and IFN $\gamma$ R<sup>-/-</sup> donor cells recovered from lungs of Mtb-infected chimeric recipient mice at 4 wpi (bone marrow chimeras described in Fig. 2F) (flow cytometry data concatenated from 4 samples); (E) Total number of alveolar macrophages (AM), parenchymal / alveolar neutrophils (Neut) and parenchymal / alveolar mononuclear myeloid cells (MMC) detected by flow cytometry among donor WT or IFN $\gamma$ R<sup>-/-</sup> cells in lungs of Mtb-infected chimeric recipient mice at 4 wpi (n = 4 mice/group); (F) Frequencies represented by parenchymal / alveolar neutrophils (Neut) and parenchymal / alveolar mononuclear myeloid cells (MMC) among mCherry Mtb<sup>+</sup> WT and IFN $\gamma$ R<sup>-/-</sup> donor cells in lungs from Mtb-infected chimeric recipient mice at 4 wpi (n = 4 mice/group); (G) Representative dot plots showing frequencies of neutrophils and CD11b<sup>+</sup> mononuclear myeloid cells (top) and mCherry Mtb staining in Ly6G<sup>+</sup> and Ly6G<sup>-</sup> cells (bottom), gated from the CD45 IV<sup>-</sup> subset in gate R4 as detailed in Fig. S1, in donor WT or IFN $\gamma$ R<sup>-/-</sup> cells obtained lungs of Mtb-infected chimeric recipient mice at 4 wpi (flow cytometry data concatenated from 4 samples). Data expressed as mean  $\pm$  standard error of mean (A, B, E and F) and dot plots from concatenated data (C, D and G). Data are representative of 2 (D, E and F) or 3 (A, B and C) independent experiments. Statistical analysis: Student's t test. \*\* = p<0.01, \*\*\* = p<0.001, \*\*\*\* = p<0.0001, n.s. = non-significant.



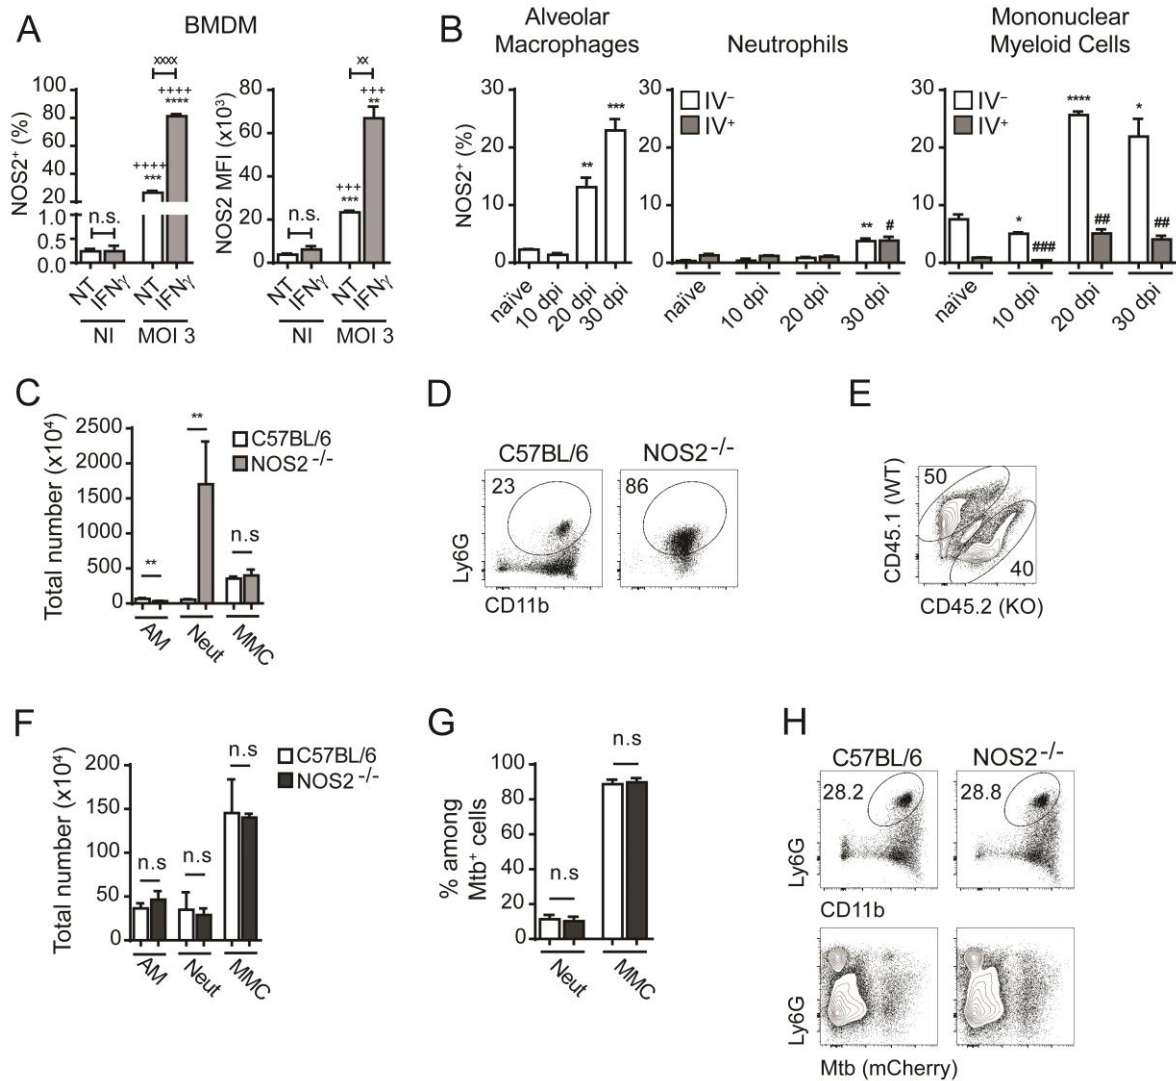

**Figure S5: Induction of NOS2 expression in vitro and in vivo by Mtb infection and validation of mixed bone marrow chimera approach for assessing the role of NOS2 signaling on HO-1 expression in vivo.** (A) Frequency of NOS2<sup>+</sup> (left) and median fluorescence intensity of NOS2 staining (right) in C57BL/6 bone marrow derived macrophages (BMDM) 24 hours after infection or not (NI – non-infected) with Mtb at a multiplicity of infection of 3 (MOI:3) and treatment or not with 250 U/ml of IFN $\gamma$  (triplicates); (B) Frequencies of NOS2<sup>+</sup> alveolar macrophages (left), IV<sup>-</sup> and IV<sup>+</sup> neutrophils (middle) and IV<sup>-</sup> and IV<sup>+</sup> mononuclear myeloid cells (right), in lungs from naïve or Mtb-infected mice at 10, 20 and 30 days post-

infection (dpi), detected by flow cytometry and gated as detailed in Fig. S1 (n = 4 mice/group); (C) Total number of alveolar macrophages (AM), parenchymal /alveolar neutrophils (Neut) and parenchymal /alveolar mononuclear myeloid cells (MMC), detected by flow cytometry and gated as detailed in Fig. S1 in lungs from Mtb-infected C57BL/6 or NOS2<sup>-/-</sup> mice at 4 weeks post-infection (wpi) (n = 4 and 3 mice/group); (D) Representative dot plots showing frequencies of neutrophils selected from the CD45 IV<sup>-</sup> subset in gate R4 as detailed in Fig. S1, in lungs from Mtb-infected C57BL/6 or NOS2<sup>-/-</sup> mice at 4 wpi (flow cytometry data concatenated from 4 and 3 samples); (E) Representative dot plots showing the frequencies of WT and NOS2<sup>-/-</sup> donor cells recovered from lungs of Mtb-infected chimeric recipient mice at 4 wpi (bone marrow chimeras described in Fig. 3C) (flow cytometry data concatenated from 3 samples); (F) Total number of alveolar macrophages (AM), parenchymal / alveolar neutrophils (Neut) and parenchymal / alveolar mononuclear myeloid cells (MMC), detected among donor WT or NOS2<sup>-/-</sup> cells in lungs of Mtb-infected chimeric recipient mice at 4 wpi (n = 3 mice/group); (G) Frequencies represented by parenchymal / alveolar neutrophils (Neut) and parenchymal / alveolar mononuclear myeloid cells (MMC) among mCherry Mtb<sup>+</sup> WT and NOS2<sup>-/-</sup> donor cells in lungs from Mtb-infected chimeric recipient mice at 4 wpi (n = 3 mice/group); (H) Representative dot plots showing frequencies of neutrophils (top) and mCherry Mtb staining in Ly6G<sup>+</sup> and Ly6G<sup>-</sup> cells (bottom), gated from the CD45 IV<sup>-</sup> subset in gate R4 as detailed in Fig. S1, in donor WT or NOS2<sup>-/-</sup> cells obtained chimeric recipient mouse lungs at 4 wpi (flow cytometry data concatenated from 3 samples). Data expressed as mean ± standard error of mean (A, B, C F and G) and dot plots from concatenated data (D, E and H). Data are representative of 2 independent experiments. Statistical analysis: Student's t test. (A) \*\* = p<0.01, \*\*\* = p<0.001 and \*\*\*\* = p<0.0001 as compared to NI – NT; +++ = p<0.001 and ++++ = p<0.0001 as compared to NI –

IFN $\gamma$ ; xx = p<0.01 and xxxx = p<0.0001, n.s. = non-significant; (B) \* = p<0.05, \*\* = p<0.01 and \*\*\*\* = p<0.0001 as compared to naïve IV<sup>-</sup>; # = p<0.05, ## = p<0.01 and ### = p<0.001 as compared to naïve IV<sup>+</sup>; (C, F and G) \*\* = p<0.01, n.s. = non-significant.

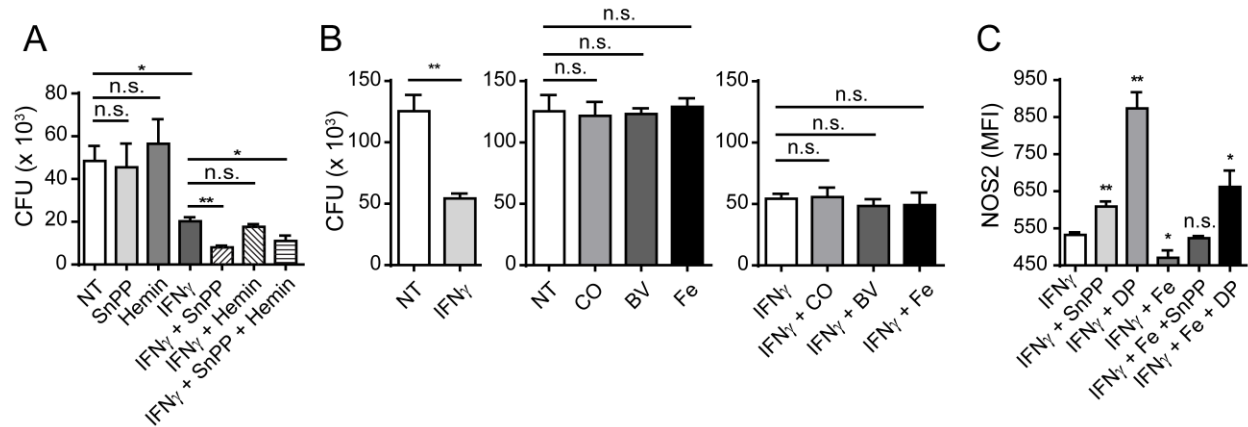

**Figure S6: Effects of heme and HO-1 enzymatic reaction products on macrophage bacterial levels *in vitro* and of iron chelation on NOS2 expression.** (A) CFU loads obtained from C57BL/6 BMDM 96 hours post-infection and stimulation or not with hemin (2.5  $\mu$ M), IFN $\gamma$  (250 U/mL), IFN $\gamma$  (250 U/mL) plus hemin (2.5 $\mu$ M) or IFN $\gamma$  (250 U/mL) plus SnPP (1 $\mu$ M) plus hemin (2.5 $\mu$ M) (triplicates); (B) CFU loads obtained from C57BL/6 BMDM 96 hours post infection and stimulation or not with (left): IFN $\gamma$  (250 U/mL), (middle): CORM2 (5 $\mu$ M) - CO, biliverdin (5  $\mu$ M) -BV or FeSO<sub>4</sub> (5  $\mu$ M) – Fe, (right): IFN $\gamma$  (250 U/mL), IFN $\gamma$  (250 U/mL) plus CORM2 (5 $\mu$ M) – IFN $\gamma$  + CO, IFN $\gamma$  (250 U/mL) plus biliverdin (5  $\mu$ M) – IFN $\gamma$  + BV or IFN $\gamma$  (250 U/mL) plus FeSO<sub>4</sub> (5  $\mu$ M) – IFN $\gamma$  + Fe (triplicates); (C) NOS2 expression measured by flow cytometry (MFI – Median of Fluorescence Intensity) in C57BL/6 BMDM 24 hours post-infection and stimulation with IFN $\gamma$  (10 U/ml) in the presence or absence of SnPP (1  $\mu$ M), 2,2' bipyridine (2,2' dipyridyl - DP – 50  $\mu$ M), FeSO<sub>4</sub> (Fe – 5  $\mu$ M), FeSO<sub>4</sub> (Fe – 5  $\mu$ M) + SnPP (1  $\mu$ M) or FeSO<sub>4</sub> (Fe – 5  $\mu$ M) + 2,2' bipyridine (2,2' dipyridyl - DP – 50  $\mu$ M) (triplicates). Data expressed as mean  $\pm$  standard error of mean. Data are representative of 2 independent experiments. Statistical analysis: Student's t test. (A and B) \* = p<0.05, \*\* = p<0.01, n.s. = non-significant; (C) \* = p<0.05, \*\* = p<0.01, n.s. = non-significant, all compared to IFN $\gamma$  alone.

**Table S1:** Antibody clones used for flow cytometry, sorting and western blot

| Molecule           | Clone       | Manufacturer                                         |
|--------------------|-------------|------------------------------------------------------|
| CD4                | GK1.5       | eBioscience/ThermoFisher Scientific                  |
| CD8 $\alpha$       | 53-6.7      | eBioscience/ThermoFisher Scientific                  |
| CD11b              | M1/70       | eBioscience/ThermoFisher Scientific                  |
| CD11c              | N418        | eBioscience/ThermoFisher Scientific                  |
| CD19               | 1D3         | BD Biosciences                                       |
| CD44               | IM7         | eBioscience/ThermoFisher Scientific                  |
| CD45               | 30-F11      | eBioscience/ThermoFisher Scientific                  |
| CD45.1             | A20         | eBioscience/ThermoFisher Scientific                  |
| CD45.2             | 104         | eBioscience/ThermoFisher Scientific                  |
| CD64               | X54-5/7.1   | eBioscience/ThermoFisher Scientific and<br>Biolegend |
| I-A/I-E            | M5/114.15.2 | eBioscience/ThermoFisher Scientific                  |
| Ly6C               | HK1.4       | Biolegend                                            |
| Ly6G               | 1A8         | Biolegend                                            |
| NK1.1              | PK136       | BD Biosciences                                       |
| TCR $\beta$        | H57-597     | BD Biosciences                                       |
| TCR $\gamma\delta$ | GL3         | BD Biosciences                                       |
| Siglec-F           | E50-2440    | BD Biosciences                                       |
| HO-1               | ADI-SPA-895 | Enzo Life Sciences                                   |
| IFN $\gamma$       | XMG1.2      | eBioscience/ThermoFisher Scientific                  |

|                                            |            |                                     |
|--------------------------------------------|------------|-------------------------------------|
| NOS2                                       | CXNFT      | eBioscience/ThermoFisher Scientific |
| Tbet                                       | 4B10       | eBioscience/ThermoFisher Scientific |
| B-actin (1E5)                              | Polyclonal | Cell Signaling Technologies         |
| Anti-rabbit IgG-HRP                        | Polyclonal | ThermoFisher Scientific             |
| F(ab') <sub>2</sub> donkey anti-rabbit IgG | Polyclonal | ThermoFisher Scientific             |

eBioscience/ThermoFisher Scientific (Waltham, MA), ThermoFisher Scientific (Waltham, MA), Biologend (San Diego, CA), BD Biosciences (San Jose, CA), Enzo Life Sciences (Farmingdale, NY), Cell Signaling Technologies (Danvers, MA).
